1  
2  
3  
4  
5  
6  
7  
8  
9  
10  
11  
12  
13  
14  
15  
16  
17  
18  
19  
20

“The green peach aphid, *Myzus persicae*, transcriptome in response to a circulative,  
nonpropagative polerovirus, *Potato leafroll virus*“.

MacKenzie F. Patton<sup>1</sup>, Allison K. Hansen<sup>3</sup>, and Clare L. Casteel<sup>1,2\*</sup>

<sup>1</sup> Department of Plant Pathology, University of California, Davis, CA, 95616, USA.

<sup>2</sup> Plant Pathology and Plant-Microbe Biology Section, School of Integrated Plant Science,  
Cornell University, Ithaca, NY, 14850, USA.

<sup>3</sup> Department of Entomology, University of California, Riverside, CA, 92521, USA.

Corresponding author:

Clare L. Casteel<sup>1,2</sup>

Email Address: [ccasteel@cornell.edu](mailto:ccasteel@cornell.edu) (CLC)

21 **Abstract:**

22 Viruses in the *Luteoviridae* family, such as *Potato leafroll virus* (PLRV), are transmitted by  
23 aphids in a circulative and nonpropagative mode. This means the virions enter the aphid body  
24 through the gut when they feed from infected plants and then the virions circulate through the  
25 hemolymph to enter the salivary glands before being released into the saliva. Although these  
26 viruses do not replicate in their insect vectors, previous studies have demonstrated viruliferous  
27 aphid behavior is altered and the obligate symbiont of aphids, *Buchnera aphidicola*, may be  
28 involved in transmission. Here we provide the transcriptome of green peach aphids (*Myzus*  
29 *persicae*) carrying *PLRV* and virus-free control aphids using Illumina sequencing. Over 150  
30 million paired-end reads were obtained through Illumina sequencing, with an average of 19  
31 million reads per library. The comparative analysis identified 134 differentially expressed genes  
32 (DEGs) between the *M. persicae* transcriptomes, including 64 and 70 genes that were down- and  
33 up-regulated in aphids carrying *PLRV*, respectively. Using functional classification in the GO  
34 databases, 80 of the DEGs were assigned to 391 functional subcategories at category level 2. The  
35 most highly up-regulated genes in aphids carrying *PLRV* were cytochrome p450s, genes related  
36 to cuticle production, and genes related to development, while genes related to histone and  
37 histone modification were the most down-regulated. *PLRV* aphids had reduced *Buchnera* titer  
38 and lower abundance of several *Buchnera* transcripts related to stress responses and metabolism.  
39 These results suggest carrying *PLRV* may reduce both aphid and *Buchnera* genes in response to  
40 stress. This work provides valuable basis for further investigation into the complicated  
41 mechanisms of circulative and nonpropogative transmission.

42

43 **Introduction:**

44 Aphids are a member of the superfamily Aphidoidea, are distributed world-wide, and cause  
45 major damage to global agricultural (1). Despite there being over 4,000 species, only about 400  
46 are known as significant pests (2). Aphids are effective pests partially because they do not  
47 require sexual reproduction and can use parthenogenesis to quickly increase their numbers (3).  
48 Another aspect of aphid biology that makes them an effective pest is their host range. Although  
49 many aphids are very specialized herbivores, only feeding on a few related species, some species  
50 feed on many taxa of plants (4). *Myzus persicae* is one of these polyphagous pests, feeding on  
51 over 40 different families, including Solanaceae (5).

52 Along with causing direct feeding damage, aphids are important plant virus vectors,  
53 representing over 50% of all known insect vectors for plant viruses (6)(7,8). Increasing evidence  
54 has shown that plant viruses alter vector host finding, dispersal, and inoculation through changes  
55 in host physiology, however the underlying mechanisms are largely unknown (9,10)(11). Recent  
56 evidence suggests that viruses may also directly affect aphid biology (12–15). *Rhopalosiphum*  
57 *padi* aphids carrying *Barley yellow dwarf virus* (BYDV), a virus from the genus *Luteovirus*,  
58 prefer non-infected hosts, while virus free *R. padi* prefer infected hosts (12). In these  
59 experiments, the authors determined this interaction was due to direct impacts on the aphid and  
60 not due to virus induced changes in host plant quality by purifying BYDV virions and feeding  
61 them to aphids in artificial diet before conducting aphid bioassays.

62 Although their lifestyle or host may change, all aphids depend on *Buchnera aphidicola* as  
63 their primary obligate endosymbiont (16). *Buchnera* provide the aphid with essential amino  
64 acids and nutrients that are limited in the aphid's diet (17–20), and because of this aphids can no  
65 longer survive without *Buchnera*. For example, when *Buchnera* is reduced by using antibiotics,

66 studies have shown lower body mass, lower fecundity, and changes to feeding behavior (21,22).  
67 Essential components of the *Buchnera* genome have been lost (23,24) as *Buchnera* co-diversified  
68 with aphids over time (16,25,26). Because of this *Buchnera* also depends on aphids for survival,  
69 living inside special aphid cells, known as “bacteriocytes”. Together, however, this mutualistic  
70 duo wreaks havoc on agriculture across the globe.

71 Previous studies have speculated *Buchnera* may have a role in aphid transmission of  
72 plant viruses (26–30). Specifically, the *Buchnera* chaperone protein GroEL, a homologue from  
73 *Escherichia coli* (31), has been implicated in transmission for a number of viruses (26,27,30,32–  
74 35). Direct interactions are thought to be unlikely due to the spatial separation of bacteriocytes  
75 and circulating virions (26). However, GroEL from *Buchnera* is found in aphid saliva and has  
76 been shown to trigger plant defenses and reduce aphid fecundity using transgenic plants  
77 expressing GroEL (36,37). Virus-induced changes in plant defense or nutrients may alter aphid-  
78 *Buchnera*-plant interactions, highlighting the need for additional research on virus-vector-  
79 *Buchnera* interactions (38).

80 *Potato leafroll virus* (PLRV) is a positive sense ssRNA virus and the type member of the  
81 genus *Polerovirus* (family *Luteoviridae*). PLRV is phloem limited and transmitted in a  
82 circulative nonpropagative form. This means the virus particles will travel across the gut  
83 membrane on specific receptors into the insect hemolymph. From here it will traverse to the  
84 salivary gland and duct so that it may be injected back into the phloem tissue (9,39). Previous  
85 studies have shown that aphid vectors prefer to settle on plants infected with PLRV and that  
86 insect vectors have higher fecundity when feeding on these plants compared to controls (5,40–  
87 42). Additionally, a recent study investigating aphid small RNAs (sRNAs), found that *M.*  
88 *persicae* who fed upon PLRV infected plants and purified PLRV diets had significantly altered

89 sRNA profiles, manipulated immune response, and differentially expressed *Buchnera* sRNAs  
90 that are associated with tRNAs (43). The role of *Buchnera* tRNA associated sRNAs is largely  
91 unclear, as their expression is conserved in divergent *Buchnera* taxa (44), they are differentially  
92 expressed during aphid development (45) and when aphids feed on different host plant diets (46).  
93 In consequence, the mechanisms mediating virus-aphid-*Buchnera* interactions are largely  
94 unknown. Recently we demonstrated PLRV induces changes in plant nutrients and defenses in  
95 infected host plant, (47) however, the impacts of these changes on symbiont-aphid interactions  
96 are unknown. To address this lack of knowledge we examined changes in the transcriptome of  
97 *M. persicae* with and without PLRV, *Buchnera* titer, and changes in aphid and *Buchnera*  
98 transcripts from aphids feeding on PLRV-infected plants. By providing evidence that  
99 nonpropagative circulative plant viruses can affect insect vectors through changes in the  
100 transcriptome and alter *Buchnera* titer, our study will contribute to growing knowledge of the  
101 insect microbiome at a plant-insect interface.

102

## 103 **Methods:**

### 104 **Plant and insect growth conditions**

105 *Solanum tuberosum* were propagated using leaf-bud cutting from cv. Désirée (48) in laboratory  
106 experiments. Plants were grown in growth chambers under controlled conditions (25/23°C  
107 day/night with a photoperiod of 16/8 h day/night). Non-viruliferous and viruliferous aphid  
108 clones of a potato-adapted red strain of *Myzus persicae* were reared under controlled conditions  
109 (25/23°C day/night with a photoperiod of 16/8 h day/night) on healthy potato. All experiments  
110 were conducted in the same environmental chambers and conditions, so there were no

111 environmental differences in treatments (25/23°C day/night with a photoperiod of 16/8 h  
112 day/night).

### 113 **Pathogen infection**

114 *Agrobacterium tumefaciens* (LBA4404) containing the infectious clone of PLRV (49) was grown  
115 at 28°C in in LB broth (+10 mM MgSO<sub>4</sub>), with kanamycin (50 µg/mL), carbenicillin (100  
116 µg/mL) and rifampicin (50 µg/mL) for selection. After 24 hours, bacteria were centrifuged to  
117 concentrate and resuspended in 10mM MgCl<sub>2</sub>. One week old *S. tuberosum* were inoculated at an  
118 optical density (OD) of 0.70. Three weeks post infection, tissue was collected from all plants,  
119 RNA was extracted using the SV Total Isolation Kit as per manufacturer's instructions  
120 (Promega, Madison, WI, USA), and cDNA was synthesized using 1500 ng of total RNA and  
121 random hexamers (20ng/µL) with the SMART® MMLV as per manufacturer's instructions  
122 (Takara Bio USA, Mountain view, CA, USA). cDNAs were used in PCRs with PLRV specific  
123 primers (F-5'ATGAGTACGGTCGTGGTT-3' and R-5'CTATTTGGGGTTTTGCAAAGC-3').  
124 A set of uninfected potato cuttings were grown at the same time as the plants above to serve as  
125 controls. After systemic plant infection was verified plants were immediately used in  
126 experiments.

127

### 128 **RNAseq, qRT-PCR, and qPCR aphid experiments**

129 Five adult aphids were placed on the first fully expanded leaflet of three infected and on three  
130 healthy plant. After 24 hours, all adults were removed and 20 larvae were left to develop. Seven  
131 days later all aphids were at the same developmental stage and 10 young aphids were collected  
132 into a tube from each plant (N=3 plants with 10 aphids per plant) and immediately frozen in  
133 liquid nitrogen until use in RNAseq experiments. The entire experiment was repeated a second

134 time for confirmation of RNAseq results using qRT-PCR and to examine the titer of the bacterial  
135 symbiont, *Buchnera*, in aphids. For this experiment 5 aphids were collected for RNA extraction  
136 and 5 aphids were collected for DNA extractions from each plant. We also prepared 6-7 plants  
137 for each treatment instead of 3 (N = 6-7 with 5 aphids per plant), however all other methods were  
138 the same.

139

#### 140 **RNA and DNA isolation from aphids**

141 RNA was extracted from aphid tissue collected in the first two experiments as described above.  
142 The RNA concentration and purity were measured using a NanoDrop. The integrity of RNA was  
143 confirmed using the Bioanalyzer 2100 system (Agilent, Santa Clara, CA, USA). DNA was  
144 extracted from aphid tissue collected in the second experiment using Cetyl trimethylammonium  
145 bromide. The integrity of DNA was confirmed using an agarose gel. The DNA concentration and  
146 purity were measured using a NanoDrop (Thermo Fisher Scientific, Waltham, MA, USA).

147

#### 148 **Library Preparation, and Sequencing.**

149 Sequencing libraries were prepared using a multiplexing library protocol (50). Briefly, oligo(dT)  
150 25 Dynabeads were used to purify mRNA, which was then fragmented, and the first-strand  
151 cDNA was synthesized using random primers, dNTP, and reverse transcriptase. The second-  
152 strand was synthesized using a dUTP mix, DNA Polymerase I, and RNase H, ends repaired, and  
153 adenylated. The cDNA fragments were ligated to adapters, selectively enriched by PCR, and  
154 purified using the AMPure XP beads. The library quality was assessed using the Agilent  
155 Bioanalyzer 2100 system and sequenced using an Illumina HiSeq 2000 instrument.

156

157 **Read mapping, differential expressed gene (DEG) analysis, and Gene Ontology (GO)**

158 **classification**

159 RNA-Seq data were analyzed using RStudio (Version 1.1.383) and Bioconductor according to  
160 Anders et al. (2013) with some modifications (48) (See Supplementary Figure S1). Sequence  
161 quality was determined, trimmed, and poor-quality reads removed using ShortRead (52) and  
162 FastQC (53). Reads were mapped to the *Myzus persicae* clone G006 genome v2.0 from  
163 AphidBase (54) using TopHat2 (55). Mapped reads were assigned to genes and counted with  
164 HTSeq (56) and normalized by size factors obtained from the negative binomial-based DESeq2  
165 package (57). Gene annotation files for both were downloaded from NCBI. After normalization,  
166 clusterization profiles of the samples were assessed by hierarchical clustering (with Euclidean  
167 distance metric and Ward's clustering method) and principal component analysis (PCA).  
168 Differentially expressed genes (DEGs) between infected and control treatments were identified  
169 using DESeq2 (57). Genes with False Discovery Rate (FDR)-corrected p-values  $\leq 0.1$  were  
170 classified as differentially expressed. For Gene ontology (GO) analysis, Blast2GO software (58)  
171 was utilized for annotation as previously described (59).

172

173 **qRT-PCR**

174 cDNA was synthesized using random hexamer (20ng/ $\mu$ L) and quantitative RT-PCR (qRT-PCR)  
175 was performed. Transcript abundance was quantified for the *M. persicae* genes, *HSP68-like*  
176 (MYZPE13164\_G006\_v1.0\_000070430.1) and *M. persicae* cuticle protein5-like (*MPCP5-like*)  
177 (MYZPE13164\_G006\_v1.0\_000133030.2), and for the *Buchnera* genes, *argE*  
178 (*BUMPUSDA\_CDS00542*), *dnaK* (*BUMPUSDA\_CDS00441*), and *groEL*



179 (*BUMPUEDA\_CDS00567*), using gene specific primers (Supplementary Table S1). qRT-PCR  
180 reactions were carried out using SYBR green PCR master mix (Applied Biosystems, Carlsbad,  
181 CA, USA), in an CFX384 instrument (Bio-Rad, Hercules, CA, USA). Three technical replicates  
182 were performed for each individual sample, and a digital pipette was used for all pipetting.  
183 Relative transcript abundance was calculated utilizing a standard curve produced from 10-fold  
184 series dilution of cDNA synthesized from 1000 ng/ $\mu$ L of total RNA according to the standard  
185 curve method (Applied Biosystems, Carlsbad, CA, USA). Technical replicates of raw CT values  
186 were averaged and transcripts of interest were normalized to the house-keeping transcript  
187 ribosomal protein L7 *rpl7* for aphids or the 50S ribosomal subunit gene *rpIN* for *Buchnera*, as  
188 previously described (60–62).

189

#### 190 ***Buchnera* titer**

191 *Buchnera* titer here is defined as the ratio of *Buchnera* single copy genes to aphid single copy  
192 genes. To determine *Buchnera* titer in whole aphid bodies we used quantitative PCR (qPCR) and  
193 measured the ratio of a single copy *Buchnera* gene (*rplN*) to a single copy aphid gene (*RPL7*).  
194 qPCR reactions were carried out using SYBR green PCR master mix (Applied Biosystems,  
195 Carlsbad, CA, USA), in the CFX384 instrument (Bio-Rad, Hercules, CA, USA). Reactions were  
196 performed in triplicate for each sample, and the average was used for analysis. Relative  
197 abundance was calculated utilizing a standard curve produced from 10-fold serial dilution of  
198 DNA.

199

## 200 **Statistical analyses**

201 RNAseq data analyses were performed as described above. All statistical analyses for qRT-PCR  
202 and qPCR were determined using a  $P < 0.05$ . Analysis of variance (ANOVA) was used to  
203 determine significant difference in transcript abundance. For *Buchnera* titer single factor  
204 ANOVA was used to determine difference in relative abundance. The statistical analyses were  
205 performed using JMP 8 software (SAS Institute, Cary, NC, USA).

206

## 207 **Results:**

### 208 **Differential gene expression in the presence of PLRV.**

209 Over 150 million paired-end reads were obtained through Illumina sequencing, with an average  
210 of 125,815, 247 100-bp reads per library (Table 1, Fig 1A). About 73% of the reads mapped to  
211 the *M. persicae* reference genome, with around only 27% being uniquely mapped (Table 1, Fig  
212 1B). In order to examine biological variability, a principal component analysis (PCA) of the  
213 normalized count data was performed (Fig 1C). The first component of variance separated  
214 samples by treatments and accounted for 54% of the variance. Hierarchical clustering confirmed  
215 PCA results in visual representation of DEG expression (Fig 1D). The transcriptome of  
216 viruliferous *M. persicae* was compared to the transcriptome of virus-free *M. persicae* using the  
217 negative binomial-based DESeq2 (57). Overall, 96 differentially expressed genes (DEGs) were  
218 detected using an FDR adjusted p-value  $\leq 0.05$  and log2 fold change (FC)  $\geq 0.5$ , however, by  
219 relaxing our FDR adjusted p-value to  $\leq 0.1$  we were able to include 38 additional DEGs (134  
220 DEGs total included; Fig 1E; Supplementary Table S2). The presence of PLRV in the aphid  
221 vector caused a down-regulation of 70 genes and an up-regulation of 64 genes (Fig 1F; FDR

222 adjusted p-value  $\leq 0.1$  and log<sub>2</sub> fold change (FC)  $\geq 0.5$ ). Overall, 0.8 % of the aphid genome was  
223 significantly impacted by the presence of PLRV.

#### 224 **Functional roles of differentially expressed genes**

225 Gene ontology (GO) enrichment analyses were performed with the DEGs from each treatment to  
226 identify functions and pathways disturbed in aphids carrying PLRV. One or more gene ontology  
227 terms were assigned to each transcript from biological processes, molecular functions, and  
228 cellular compartments term using Blast2GO functional gene annotation (Conesa et al. 2005). The  
229 134 DEGs were assigned to functional GO terms within the three categories, including 125  
230 biological processes, 118 molecular functions, and 148 cellular compartments. Of the 134 DEGs,  
231 53 (39.55% of total DEGs) were classified as “uncharacterized proteins.” The majority of DEGs  
232 assigned to biological processes were categorized as metabolic processes (41%), cellular-protein  
233 processes (11%), and oxidation-reduction processes (11%) (Fig 2A). As for DEGs assigned to  
234 molecular functions, almost half were associated with catalytic activity (33%) or nucleic acid  
235 binding (21%) (Fig 2B). Within the cellular component category, 24% were related to the  
236 membrane and 24% were related to intracellular locations (Fig 2C).

237 Next each DEGs was annotated using a single Blast2GO consensus description. Many of  
238 the genes up-regulated in PLRV aphids were related to cuticle formation and development (16%)  
239 and catalytic activity (16%), however the majority of up-regulated transcripts were  
240 uncharacterized (31%; Fig 3A). The largest groups of down-regulated genes in PLRV aphids  
241 were related to histones (10%), catalytic activity (10%), transmembrane transport (9%),  
242 proteolysis or protein ubiquitination (7%), and nucleic acid binding and metabolic processes  
243 (7%; Fig 3B). A significant proportion of the down-regulated transcripts in PLRV aphids were  
244 also uncategorized (47%). The most highly expressed DEGs included transcripts related to

245 cuticle formation and development and 4C1-like cytochrome P450s (Table 2). The most down-  
246 regulated transcripts in PLRV aphid were related to histones and histone modifying proteins  
247 (Table 3).

#### 248 **Validation of aphid transcripts via RT-qPCR**

249 To validate the RNAseq analysis a separate experiment was performed using the same  
250 experimental design and the transcript abundance of one up-regulated gene  
251 (MYZPE13164\_G006\_v1.0\_000133030.2 (*MPCP5-like*)) and one down-regulated gene  
252 (MYZPE13164\_G006\_v1.0\_000070430.1 (*HSP68-like*)) was measured using qRT-PCR (bolded  
253 genes in Table 2 and 3). Consistent with the RNA-seq data, abundance of the *MPCP5-like*  
254 transcript was significantly higher in viruliferous *M. persicae* compared to virus-free controls  
255 (10.045, 2.017, relative expression respectively;  $p = 0.019$ ; Fig. 4A). Abundance of the *HSP68-*  
256 *like* transcript was significantly lower in viruliferous *M. persicae* when compared to virus-free  
257 controls (1.44, 5.51, relative expression respectively;  $p < 0.01$ ) (Fig 4A-B).

258

#### 259 **The impact of PLRV on *Buchnera aphidicola* titer**

260 *Buchnera* has been previously implicated in transmission of PLRV and other luteoviruses  
261 (26,28,30,34,63), however *Buchnera* titer and coding sequence transcripts have not been  
262 examined in aphids carrying PLRV. From our experiments, *Buchnera* titer was ~1.5 times higher  
263 for virus-free aphids compared to aphids carrying PLRV (ratios 6.42, 4.20 respectively;  $p =$   
264 0.037; Fig 5A). To investigate the potential mechanisms mediating decreases in *Buchnera* titer  
265 we measured abundance of two transcripts related to stress, *dnaK* (64,65) and *groEL* (65,66), and  
266 one transcript related to metabolism, *argE* (45). Abundance of all three transcripts were reduced  
267 in aphids carrying PLRV compared to controls. Viruliferous aphids had 36.68% less *argE*

268 transcripts ( $p = 0.026$ ), 16.67% less *groEL* transcripts ( $p = 0.024$ ), and 18.77% less *dnaK*  
269 transcripts ( $p = 0.046$ ) compared to that of the virus free aphids (Fig 5B-D).

270

## 271 **Discussion:**

272 The main focus of this paper was to examine the effect that *Potato leafroll virus* has on the  
273 transcriptome of *M. persicae*, and their primary endosymbiont *Buchnera aphidicola*. The largest  
274 category of known up-regulated transcripts in viruliferous aphids compared to controls were  
275 related to the cuticle and cuticle development. Insect cuticles are largely composed of a protein  
276 matrix embedded with chitin filaments (67). Cuticle proteins (CPs) have been shown to be  
277 involved in general development, molting, transmission of non-persistent viruses, and insecticide  
278 resistance through changes cuticle permeability (33,68–71). In *Acyrtosiphon pisum*, 19 CPs  
279 were found to be regulated by photoperiodism and suspected to be involved in the transition  
280 from asexual to sexual production (72). Further, cuticle proteins have been implicated as  
281 potentially facilitating transmission of *Barley yellow dwarf virus* (BYDV-GPV), *Cereal yellow*  
282 *dwarf virus* (CYDV-RPV), and *Turnip yellows virus* (TuYV), three related Luteoviridae viruses  
283 (73–75) . Whilst we cannot know the function of changes in CP transcripts in PLRV-aphid  
284 interactions from these experiments, these genes represent promising targets for further  
285 investigation.

286 In addition to many cuticle related proteins, five *cytochrome P450s* genes were  
287 significantly up-regulated in viruliferous aphids compared to controls. Cytochrome P450s play  
288 important roles in hormones and pheromones metabolism but are more famous for their roles in  
289 the metabolism of insecticides and host plant chemicals. Polyphagous insects, like *M. persicae*,  
290 encounter many different hosts and tend to have high numbers P450-based metabolism of

291 allelochemicals compared to more specialized aphids (76). Previous work has shown that a  
292 *cytochrome 450 gene (CYP6CY3)* was found to increase nicotine tolerance and aphid host  
293 adaptation (77,78). It has been previously hypothesized that upregulation of p450s could help  
294 insect vectors tolerate less desirable hosts which could be beneficial to the virus (79).

295       Transcripts encoding a heat shock protein (HSP68-like) was among the most down-  
296 regulated in viruliferous aphids compared to controls. HSP68 is a member of the HSP70 family,  
297 which are important chaperone proteins that are known to be up-regulated in response to stress.  
298 One study found that the *HSP70* from *Bemisia tabaci* is up-regulated after acquisition of *Tomato*  
299 *yellow leaf curl virus (TYLCV)* (80). They went on to show that HSP70 protein can directly  
300 interact with TYLCV using *in vitro* studies and that they co-localize together in insect midgut  
301 cells using *in situ* hybridization. The authors suggest HSP70 may play an inhibitory role in virus  
302 transmission, as transmission was reduced when whiteflies were fed HSP70 antibodies. Because  
303 *HSP68-like* transcripts were down-regulated in aphids carrying PLRV in our study, it's tempting  
304 to speculate that this may increase PLRV transmission. Porrás et al. demonstrated that BYDV-  
305 PAV, a strain that is only transmitted by *Rhopalosiphum padi* (bird-cherry oat aphid), up-  
306 regulated the abundance of three *HSP70* transcripts in the aphid vector. The authors found  
307 BYDV infection increases plant surface temperature and aphid heat tolerance, suggesting a  
308 protective role of HSP70 proteins in virus-aphid-plant interactions (81). Although it is not known  
309 if PLRV increases plant surface temperature and vector heat tolerance, it has been shown that  
310 potato plants kept at higher temperatures are more susceptible to PLRV than compared to lower  
311 temperatures (82). Also aphid acquisition and transmission at higher temperatures has previous  
312 resulted in higher transmission rates compared to lower temperatures (83), however at very high

313 temperatures differences were reduced (84). It is not known how decreases in *HSP68-like*  
314 transcripts in aphids carrying PLRV in our study may alter aphid heat tolerance.

315 Several histone genes were down-regulated in viruliferous *M. persicae* compared to  
316 controls in this study. Histones are involved in DNA organization and regulation of gene  
317 expression (85), but have also been shown to be induced in response to stress and starvation (86).  
318 Histone depletion can lead to changes to an open chromatin configuration and large scale shifts  
319 in expression, however it should be noted histone depletion is also associated with DNA damage  
320 (87). In a recent study investigating small RNAs (sRNAs), *M. persicae* who fed upon PLRV  
321 infected plants and purified PLRV diets had significantly altered sRNA profiles and immune  
322 responses. Ultimately, the significance of this response is unknown, and further investigation is  
323 necessary to understand potential impacts of the downregulation of these genes.

324 In this study there was a significant reduction of *Buchnera* titer and *Buchnera* gene  
325 expression of three genes (*dnaK*, *groEL*, and *argE*) in aphids carrying PLRV compared to  
326 control aphids. In general, gene regulation at the mRNA level in *Buchnera* is thought to be  
327 minimal because *Buchnera* transcription factors are reduced (88) and very few transcriptional  
328 responses had been observed previously (17). Only two transcription initiation factors ( $\sigma_{32}$  and  
329  $\sigma_{70}$ ), the heat shock and housekeeping transcription factors, respectively, remain in *Buchnera*  
330 *Myzus*'s genomes (89) similar to other *Buchnera* taxa (90). The housekeeping sigma factor  
331 ( $\sigma_{70}$ ) initiates transcription of *argE* which is regulated by the repressor *argR* when bound to  
332 arginine in *Escherichia coli* (91). Similar to other *Buchnera* taxa *Buchnera Myzus*'s genomes  
333 (89) has lost the repressor *argR* so it is unclear how this gene is down-regulated in virus infected  
334 aphids compared to un-infected aphids. The other two *Buchnera* genes (*dnaK* and *groEL*) that  
335 were down-regulated in this study in aphids carrying PLRV compared to control aphids are

336 associated with the heat shock regulon (90). Moreover, these *Buchnera* genes still retain  
337 recognizable  $\sigma_{32}$  promoter sites up-stream of *dnaK* and *groEL* in the Myzus *Buchnera* G006  
338 genome (NCBI Reference Sequence: NZ\_MJNC01000001; Supplemental Table 3) similar to  
339 other *Buchnera* taxa (90). The  $\sigma_{32}$  heat shock response is highly conserved in bacteria and is  
340 initiated in response to stress, such as heat shock or other environmental stressors that destabilize  
341 proteins (92). In general, compared to free-living bacteria, *Buchnera* only modestly up-regulates  
342 genes that still retain the upstream  $\sigma_{32}$  promoter sites during heat shock (90). In this study it is  
343 unclear how PLRV is either directly or indirectly dampening *Buchnera*'s expression of *dnaK* and  
344 *groEL* and if it is through a similar mechanism that is also down-regulating the aphid's stress  
345 response genes including *Hsp70*.

346         A decrease in *Buchnera* titer has previously been associated with different aphid clones  
347 (93), plant diets (16), increasing aphid nymphal age (94,95), and heat shock (95–97). For  
348 example, a mutation in the promoter region of the heat shock gene (*ibpA*) results in the reduction  
349 of *Buchnera* titer (96). Given that the experiments in this study were conducted in the same  
350 environment at the same temperature it is highly unlikely that the control aphids experienced  
351 heat shock compared to virus infected aphids. Instead, we hypothesize that the virus PLRV is  
352 reducing *Buchnera*'s ability to up-regulate genes that are associated with the heat shock regulon  
353 and this may lead to increased stress and lysing of *Buchnera* cells and ultimately a reduction of  
354 *Buchnera* titer. For example, most obligate pathogens and symbionts, including *Buchnera*,  
355 overexpress the protein GroEL during non-heat shock conditions to rescue misfolded proteins  
356 (98). Alternatively, as PLRV-infected plants have higher concentrations of free amino acids (47)  
357 and we cannot discount the indirect impacts of host plant changes on *Buchnera* titer in our  
358 experimental design, similar to Zhang et al. (16) where a change in host plant diet influenced



359 *Buchnera* titer. *Buchnera* sRNA's that are hypothesized to regulate *Buchnera* gene expression at  
360 the post-transcriptional level have been observed to be differentially expressed when aphids feed  
361 on host plants that vary in essential amino acids (46). In turn, aphids carrying PLRV may obtain  
362 higher levels of essential amino acids from virus infected plants and as such *Buchnera* genes that  
363 are involved in arginine biosynthesis, such as *argE*, are down-regulated compared to control  
364 aphids feeding on un-infected plants with lower amounts of essential amino acids.

365 In other insect-plant pathogen systems plant pathogens are known to modulate obligate  
366 symbiont titer. For example, in whiteflies *Portiera* titer is modulated by the co-occurrence of its  
367 facultative symbiont *Rickettsia* and the Tomato Yellow Leaf Curl Virus (99). In a second system,  
368 the obligate symbionts *Carsonella* and *Profftella* of the psyllid *Diaphorina citri* decrease in titer  
369 when the plant pathogen *Ca. Liberibacter asiaticus* infects *D. citri* male adults, whereas no  
370 significant difference was found in infected female adults (100,101). In adult females' ovaries,  
371 *Carsonella* and *Profftella* titer increased when infected by *Ca. L. asiaticus*. The latter authors  
372 hypothesized that endosymbionts titer increases as a part of the psyllid's immune response  
373 and/or response to altered plant nutrition by *Ca. L. asiaticus* infection (100).

374 In general, this work improves our understanding of the relationships that exist between  
375 hosts, viruses, vectors, and endosymbionts, but it also opens up more questions regarding the  
376 complexity and depth of these relationships. Aphids and bacterial endosymbionts may benefit  
377 from relationships with plant-infecting viruses indirectly or directly but additional studies are  
378 needed. Although it is known that *Buchnera* titer and gene expression responses vary with aphid  
379 lineages (102), it is not known how this is impacted by long term associations with plant-infecting  
380 viruses. In regions where virus pressure is high or where poor hosts dominate, aphids may more  
381 often be associated with plant infecting viruses. Given the mounting evidence of virus

382 manipulation of insect vectors, this could have lasting impacts on the population structures of  
383 these insect vectors and their obligate endosymbiont.

384

### 385 **Acknowledgments**

386 We think Laura Baldwin, Sarah Kate Muehleck, and the many undergraduates that helped with  
387 experiments. We thank Gabriella Arena for advice on RNAseq analysis. This work was  
388 supported by USDA-NIFA award 2017-67013-26537 and award 2013-2013-03265 to CLC.

389

### 390 **Author contributions**

391 CLC conceived the project. MFP and CLC designed the research. MFP and CLC performed  
392 research and analyzed the data. AKH, MFP, and CLC interpreted the data. AKH, MFP, and CLC  
393 wrote the article.

394

### 395 **References:**

- 396 1. Remaudiere G, Remaudiere M. Catalogue of the world's Aphididae: Homoptera Aphidoidea.  
397 Paris, France: Institut National de la Recherche Agronomique (INRA); 1997. pp. 473-1275.
- 398 2. Fereres A, Irwin ME, Kamppeier GE. Aphid movement: process and consequences. In: van  
399 Emden HF, R. H, editors. Aphids as crop pests. 2nd ed. Oxfordshire, UK: CABI; 2017. p. 196–  
400 200.
- 401 3. Heck M. Insect Transmission of Plant Pathogens: a Systems Biology Perspective. *mSystems*®.  
402 2018;3(2):e00168-17. doi: 10.1128/mSystems.00168-17.
- 403 4. Adams D, Douglas AE. How symbiotic bacteria influence plant utilisation by the polyphagous  
404 aphid, *Aphis fabae*. *Oecologia*. 1997;110(4):528–32. doi: 10.1007/s004420050190.
- 405 5. Pinheiro P V, Ghanim M, Alexander MM, Rebelo AR, Santos RS, Orsburn BC, et al. Host plants

- 406 indirectly influence plant virus transmission by altering gut cysteine protease activity of aphid  
407 vectors. *Mol Cell Proteomics*. 2017;16(4 suppl 1):S230–43. doi: 10.1074/mcp.M116.063495.
- 408 6. Ng JCK, Perry KL. Transmission of plant viruses by aphid vectors. *Mol Plant Pathol*.  
409 2004;5(5):505-11. doi: 10.1111/j.1364-3703.2004.00240.x.
- 410 7. Whitfield AE, Falk BW, Rotenberg D. Insect vector-mediated transmission of plant viruses.  
411 *Virology*. 2015;479–480:278–89. doi: 10.1016/j.virol.2015.03.026.
- 412 8. Elena SF, Bernet GP, Carrasco JL. The games plant viruses play. *Curr Opin Virol*. 2014;8:62–7.  
413 doi: 10.1016/j.coviro.2014.07.003.
- 414 9. Casteel CL, Falk BW. Plant virus-vector interactions: More than just for virus transmission. In:  
415 Wang A., Zhou X., editors. *Current Research Topics in Plant Virology*. 2016. p. 217 – 240. doi:  
416 10.1007/978-3-319-32919-2\_9.
- 417 10. Eigenbrode SD, Bosque-Pérez NA, Davis TS. Insect-borne plant pathogens and their vectors:  
418 ecology, evolution, and complex interactions. *Annu Rev Entomol*. 2018;63:169-191. doi:  
419 10.1146/annurev-ento-020117-043119.
- 420 11. Blanc S, Michalakakis Y. Manipulation of hosts and vectors by plant viruses and impact of the  
421 environment. *Curr Opin Insect Sci*. 2016; 16:36–43. doi: 10.1016/j.cois.2016.05.007.
- 422 12. Ingwell LL, Eigenbrode SD, Bosque-Pérez NA. Plant viruses alter insect behavior to enhance their  
423 spread. *Sci Rep*. 2012;2(1):578. doi: 10.1038/srep00578.
- 424 13. Stafford CA, Yang LH, McMunn MS, Ullman DE. Virus infection alters the predatory behavior of  
425 an omnivorous vector. *Oikos*. 2014;123:1384-1390. doi: 10.1111/oik.01148.
- 426 14. Wang Q, Li J, Dang C, Chang X, Fang Q, Stanley D, et al. *Rice dwarf virus* infection alters green  
427 rice leafhopper host preference and feeding behavior. *PLoS One*. 2018;13(9):1–16. doi:  
428 10.1371/journal.pone.0203364.
- 429 15. Stafford CA, Walker GP, Ullman DE. Infection with a plant virus modifies vector feeding  
430 behavior. *Proc Natl Acad Sci*. 2011;108(23):9350–5. doi: 10.1073/pnas.1100773108.
- 431 16. Zhang YC, Cao WJ, Zhong LR, Godfray HCJ, Liu XD. Host plant determines the population size

- 432 of an obligate symbiont (*Buchnera aphidicola*) in aphids. Appl Environ Microbiol.  
433 2016;82(8):2336–46. doi: 10.1128/AEM.04131-15.
- 434 17. Hansen AK, Moran NA. Aphid genome expression reveals host-symbiont cooperation in the  
435 production of amino acids. Proc Natl Acad Sci. 2011;108(7):2849–54. doi:  
436 10.1073/pnas.1013465108.
- 437 18. Nakabachi A, Shigenobu S, Sakazume N, Shiraki T, Hayashizaki Y, Carninci P, et al.  
438 Transcriptome analysis of the aphid bacteriocyte, the symbiotic host cell that harbors an  
439 endocellular mutualistic bacterium, *Buchnera*. Proc Natl Acad Sci. 2005;102(15):5477–82. doi:  
440 10.1073/pnas.1013465108.
- 441 19. Wernegreen JJ. Strategies of genomic integration within insect-bacterial mutualisms. Biol Bull.  
442 2012;223(1):112–22. doi: 10.1086/BBLv223n1p112.
- 443 20. Zhang Y, Su X, Harris A, Caraballo-Ortiz MA, Ren Z, Zhong Y. Genetic structure of the bacterial  
444 endosymbiont, *Buchnera aphidicola*, from its host aphid, *Schlechtendalia chinensis*, and  
445 evolutionary implications. Curr Microbiol. 2018;75(3):309–15. doi: 10.1007/s00284-017-1381-0.
- 446 21. Zhang F, Li X, Zhang Y, Coates B, Zhou XJ, Cheng D. Bacterial symbionts, *Buchnera*, and  
447 starvation on wing dimorphism in English grain aphid, *Sitobion avenae* (F.) (Homoptera:  
448 Aphididae). Front Physiol. 2015;6:155. doi: 10.3389/fphys.2015.00155.
- 449 22. Machado-Assefh CR, Lopez-Isasmendi G, Tjallingii WF, Jander G, Alvarez AE. Disrupting  
450 *Buchnera aphidicola*, the endosymbiotic bacteria of *Myzus persicae*, delays host plant acceptance.  
451 Arthropod Plant Interact. 2015;9(5):529–41. doi: 10.1007/s11829-015-9394-8.
- 452 23. Tamas I, Klasson L, Canbäck B, Näslund AK, Eriksson AS, Wernegreen JJ, et al. 50 Million years  
453 of genomic stasis in endosymbiotic bacteria. Science. 2002;296(5577):2376–9. doi:  
454 10.1126/science.1071278.
- 455 24. Van Ham RCHJ, Kamerbeek J, Palacios C, Rausell C, Abascal F, Bastolla U, et al. Reductive  
456 genome evolution in *Buchnera aphidicola*. Proc Natl Acad Sci. 2003;100 (2) 581–586. doi:  
457 10.1073/pnas.0235981100.

- 458 25. Douglas AE. Nutritional interactions in insect-microbial symbioses: aphids and their symbiotic  
459 bacteria *Buchnera*. *Annu Rev Entomol.* 1998;43(1):17–37. doi: 10.1146/annurev.ento.43.1.17.
- 460 26. Bouvaine S, Boonham N, Douglas AE. Interactions between a *Luteovirus* and the GroEL  
461 chaperonin protein of the symbiotic bacterium *Buchnera aphidicola* of aphids. *J Gen Virol.*  
462 2011;92(6):1467–74. doi: 10.1099/vir.0.029355-0
- 463 27. Rana VS, Singh ST, Priya NG, Kumar J, Rajagopal R. *Arsenophonus* GroEL interacts with  
464 CLCuV and is localized in midgut and salivary gland of whitefly *B. tabaci*. *PLoS One.*  
465 2012;7(8):e42168. doi: 10.1371/journal.pone.0042168.
- 466 28. Kliot A, Ghanim M. The role of bacterial chaperones in the circulative transmission of plant  
467 viruses by insect vectors. *Viruses.* 2013;5(6):1516-35. doi: 10.3390/v5061516.
- 468 29. Filichkin SA, Brumfield S, Filichkin TP, Young MJ. In vitro interactions of the aphid  
469 endosymbiotic SymL chaperonin with *Barley yellow dwarf virus*. *J Virol.* 1997;71(1):569-77. doi:  
470 10.1128/JVI.71.1.569-577.1997.
- 471 30. van den Heuvel JF, Verbeek M, van der Wilk F. Endosymbiotic bacteria associated with  
472 circulative transmission of *Potato leafroll virus* by *Myzus persicae*. *J Gen Virol.* 1994;75 ( Pt  
473 10):2559-65. doi: 10.1099/0022-1317-75-10-2559.
- 474 31. Gray SM, Gildow FE. *Luteovirus*-aphid interactions. *Annu Rev Phytopathol.* 2003;41(1):539–66.  
475 doi: 10.1146/annurev.phyto.41.012203.105815
- 476 32. Li C, Cox-Foster D, Gray SM, Gildow F. Vector specificity of *Barley yellow dwarf virus* (BYDV)  
477 transmission: identification of potential cellular receptors binding BYDV-MAV in the aphid,  
478 *Sitobion avenae*. *Virology.* 2001;286(1):125-33. doi: 10.1006/viro.2001.0929.
- 479 33. Dombrovsky A, Gollop N, Chen S, Chejanovsky N, Raccah B. In vitro association between the  
480 helper component-proteinase of *Zucchini yellow mosaic virus* and cuticle proteins of *Myzus*  
481 *persicae*. *J Gen Virol.* 2007;88(5):1602–10. doi: 10.1099/vir.0.82769-0
- 482 34. van den Heuvel JF, Bruyère A, Hogenhout SA, Ziegler-Graff V, Brault V, Verbeek M, et al. The  
483 N-terminal region of the *luteovirus* readthrough domain determines virus binding to *Buchnera*

- 484 GroEL and is essential for virus persistence in the aphid. *Journal of Virology*. 1997;71(10):7258-  
485 65. doi: 10.1128/JVI.71.10.7258-7265.1997.
- 486 35. Morin S, Ghanim M, Zeidan M, Czosnek H, Verbeek M, van den Heuvel JF. A GroEL homologue  
487 from endosymbiotic bacteria of the whitefly *Bemisia tabaci* is implicated in the circulative  
488 transmission of *Tomato yellow leaf curl virus*. *Virology*. 1999;256(1):75-84. doi:  
489 10.1006/viro.1999.9631.
- 490 36. Chaudhary R, Atamian HS, Shen Z, Briggs SP, Kaloshian I. GroEL from the endosymbiont  
491 *Buchnera aphidicola* betrays the aphid by triggering plant defense. *Proc Natl Acad Sci*.  
492 2014;111(24):8919–24. doi: 10.1073/pnas.1407687111.
- 493 37. Vandermoten S, Harmel N, Mazzucchelli G, De Pauw E, Haubruge E, Francis F. Comparative  
494 analyses of salivary proteins from three aphid species. *Insect Mol Biol*. 2014;23(1):67–77. doi:  
495 10.1111/imb.12061.
- 496 38. Casteel CL, Hansen AK. Evaluating insect-microbiomes at the plant-insect interface. *J Chem Ecol*.  
497 2014;40(7):836–47. doi: 10.1007/s10886-014-0475-4.
- 498 39. Gray SM, Cilia M, Ghanim M. Circulative, “nonpropagative” virus transmission: An orchestra of  
499 virus-, insect-, and plant-derived instruments. *Adv Virus Res*. 2014;89. doi: 10.1016/B978-0-12-  
500 800172-1.00004-5.
- 501 40. Eigenbrode SD, Ding H, Shiel P, Berger PH. Volatiles from potato plants infected with *Potato*  
502 *leafroll virus* attract and arrest the virus vector, *Myzus persicae* (Homoptera: Aphididae). *Proc*  
503 *Biol Sci*. 2002;269(1490):455-60. doi: 10.1098/rspb.2001.1909.
- 504 41. Heck M, Brault V. Targeted disruption of aphid transmission: a vision for the management of crop  
505 diseases caused by Luteoviridae members. *Curr Opin Virol*. 2018;33:24-32. doi:  
506 10.1016/j.coviro.2018.07.007.
- 507 42. Rajabaskar D, Wu Y, Bosque-Pérez NA, Eigenbrode SD. Dynamics of *Myzus persicae* arrestment  
508 by volatiles from *Potato leafroll virus*-infected potato plants during disease progression. *Entomol*  
509 *Exp Appl*. 2013;148(2). doi: 10.1111/eea.12087.

- 510 43. Pinheiro P V, Wilson JR, Xu Y, Zheng Y, Rebelo AR, Fattah-Hosseini S, et al. Plant viruses  
511 transmitted in two different modes produce differing effects on small RNA-mediated processes in  
512 their aphid vector. *Phytobiomes J.* 2019;3(1):71. doi: 10.1094/PBIOMES-10-18-0045-R.
- 513 44. Hansen AK, Moran NA. Altered tRNA characteristics and 3' maturation in bacterial symbionts  
514 with reduced genomes. *Nucleic Acids Res.* 2012;40(16):7870-84. doi: 10.1093/nar/gks503.
- 515 45. Thairu MW, Cheng S, Hansen AK. A sRNA in a reduced mutualistic symbiont genome regulates  
516 its own gene expression. *Mol Ecol.* 2018;27(8):1766–76. doi: 10.1111/mec.14424.
- 517 46. Thairu MW, Hansen AK. Changes in aphid host plant diet influence the small-RNA expression  
518 profiles of its obligate nutritional symbiont, *Buchnera*. *mBio.* 2019;10 (6) e01733-19. doi:  
519 10.1128/mBio.01733-19.
- 520 47. Patton MF, Bak A, Sayre JM, Heck ML, Casteel CL. A polerovirus, *Potato leafroll virus*, alters  
521 plant–vector interactions using three viral proteins. *Plant Cell Environ.* 2020;43(2):387-399. doi:  
522 10.1111/pce.13684.
- 523 48. Sadowy E, Juszczuk M, David C, Gronenborn B, Danuta Hulanicka MD. Mutational analysis of  
524 the proteinase function of *Potato leafroll virus*. *J Gen Virol.* 2001;82(Pt 6):1517-1527. doi:  
525 10.1099/0022-1317-82-6-1517.
- 526 49. DeBlasio SL, Johnson R, Mahoney J, Karasev A, Gray SM, MacCoss MJ, et al. Insights into the  
527 *polerovirus*– plant interactome revealed by coimmunoprecipitation and mass spectrometry. *Mol*  
528 *Plant-Microbe Interact.* 2015;28(4):467–81. doi: 10.1094/MPMI-11-14-0363-R.
- 529 50. Zhong S, Joung JG, Zheng Y, Chen YR, Liu B, Shao Y, et al. High-throughput illumina strand-  
530 specific RNA sequencing library preparation. *Cold Spring Harb Protoc.* 2011;2011(8):940-9. doi:  
531 10.1101/pdb.prot5652.
- 532 51. Anders S, McCarthy DJ, Chen Y, Okoniewski M, Smyth GK, Huber W, et al. Count-based  
533 differential expression analysis of RNA sequencing data using R and Bioconductor. *Nat Protoc.*  
534 2013;8(9):1765-86. doi: 10.1038/nprot.2013.099.
- 535 52. Morgan M, Anders S, Lawrence M, Aboyoun P, Pagès H, Gentleman R. ShortRead: A



- 536 bioconductor package for input, quality assessment and exploration of high-throughput sequence  
537 data. *Bioinformatics*. 2009;25(19):2607–8. doi: 10.1093/bioinformatics/btp450.
- 538 53. Andrews S. FastQC: A quality control tool for high throughput sequence data.  
539 <http://www.bioinformatics.babraham.ac.uk/projects/fastqc/>. 2010.
- 540 54. Gauthier JP, Legeai F, Zasadzinski A, Rispe C, Tagu D. AphidBase: A database for aphid  
541 genomic resources. *Bioinformatics*. 2007;23(6):783–4. doi: 10.1093/bioinformatics/btl682.
- 542 55. Kim D, Pertea G, Trapnell C, Pimentel H, Kelley R, Salzberg SL. TopHat2: Accurate alignment of  
543 transcriptomes in the presence of insertions, deletions and gene fusions. *Genome Biol*.  
544 2013;14:R36. doi: 10.1186/gb-2013-14-4-r36.
- 545 56. Anders S, Pyl PT, Huber W. HTSeq-A Python framework to work with high-throughput  
546 sequencing data. *Bioinformatics*. 2015;31(2):166-9. doi: 10.1093/bioinformatics/btu638.
- 547 57. Love MI, Huber W, Anders S. Moderated estimation of fold change and dispersion for RNA-seq  
548 data with DESeq2. *Genome Biol*. 2014;15(12):550. doi: 10.1186/s13059-014-0550-8.
- 549 58. Conesa A, Götz S, García-Gómez JM, Terol J, Talón M, Robles M. Blast2GO: A universal tool  
550 for annotation, visualization and analysis in functional genomics research. *Bioinformatics*.  
551 2005;21(18):3674-6. doi: 10.1093/bioinformatics/bti610
- 552 59. Patton MF, Arena GD, Salminen JP, Steinbauer MJ, Casteel CL. Transcriptome and defence  
553 response in *Eucalyptus camaldulensis* leaves to feeding by *Glycaspis brimblecombei* Moore  
554 (Hemiptera: Aphalaridae): a stealthy psyllid does not go unnoticed. *Austral Entomol*.  
555 2017;57(2):247–54. doi: 10.1111/aen.12319
- 556 60. Casteel CL, De Alwis M, Bak A, Dong H, Whitham SA, Jander G. Disruption of ethylene  
557 responses by *Turnip mosaic virus* mediates suppression of plant defense against the green peach  
558 aphid vector. *Plant Physiol*. 2015;169(1):209–18. doi: 10.1104/pp.15.00332
- 559 61. Nikoh N, McCutcheon JP, Kudo T, Miyagishima SY, Moran NA, Nakabachi A. Bacterial genes in  
560 the aphid genome: Absence of functional gene transfer from *Buchnera* to its host. *PLoS Genet*.  
561 2010;6(2):e1000827. doi: 10.1371/journal.pgen.1000827.



- 562 62. Hansen AK, Degnan PH. Widespread expression of conserved small RNAs in small symbiont  
563 genomes. *ISME J.* 2014;8(12):2490-502. doi: 10.1038/ismej.2014.121.
- 564 63. Hogenhout SA, van der Wilk F, Verbeek M, Goldbach RW, van den Heuvel JF. *Potato leafroll*  
565 *virus* binds to the equatorial domain of the aphid endosymbiotic GroEL homolog. *J Virol.*  
566 1998;72(1):358-65. doi: 10.1128/JVI.72.1.358-365.1998.
- 567 64. Camberg JL, Doyle SM, Johnston DM, Wickner S. Molecular Chaperones. In: Brenner's  
568 Encyclopedia of Genetics: Second Edition. Elsevier; 2013. p. 456–60. doi: 10.1016/B978-0-12-  
569 809633-8.06723-6.
- 570 65. Segal G, Ron EZ. Regulation and organization of the *groE* and *dnaK* operons in Eubacteria .  
571 *FEMS Microbiol Lett.* 1996;138(1):1–10. doi: 10.1111/j.1574-6968.1996.tb08126.x
- 572 66. Zhang L, Pelech S, Uitto VJ. Bacterial GroEL-like heat shock protein 60 protects epithelial cells  
573 from stress-induced death through activation of ERK and inhibition of caspase 3. *Exp Cell Res.*  
574 2004;292(1):231-40. doi: 10.1016/j.yexcr.2003.08.012.
- 575 67. Dombrovsky A, Sobolev I, Chejanovsky N, Raccach B. Characterization of RR-1 and RR-2  
576 cuticular proteins from *Myzus persicae*. *Comp Biochem Physiol - B Biochem Mol Biol.*  
577 2007;146(2):256–64. doi: 10.1016/j.cbpb.2006.11.013.
- 578 68. Dombrovsky A, Huet H, Zhang H, Chejanovsky N, Raccach B. Comparison of newly isolated  
579 cuticular protein genes from six aphid species. *Insect Biochem Mol Biol.* 2003;33(7):709–15. doi:  
580 10.1016/s0965-1748(03)00065-1.
- 581 69. Liang Y, Gao XW. The cuticle protein gene MPCP4 of *Myzus persicae* (Homoptera: Aphididae)  
582 plays a critical role in cucumber mosaic virus acquisition. *J Econ Entomol.* 2017;110(3):848–53.  
583 doi: 10.1093/jee/tox025
- 584 70. Silva AX, Jander G, Samaniego H, Ramsey JS, Figueroa CC. Insecticide resistance mechanisms in  
585 the green peach aphid *Myzus persicae* (Hemiptera: Aphididae) I: A transcriptomic survey. *PLoS*  
586 *One.* 2012;7(6):e36366. doi: 10.1371/journal.pone.0036366
- 587 71. Deshoux M, Monsion B, Uzest M. Insect cuticular proteins and their role in transmission of

- 588           phytoviruses. *Curr Opin Virol.* 2018;33:137-143. doi: 10.1016/j.coviro.2018.07.015.
- 589   72.   Gallot A, Risper C, Leterme N, Gauthier JP, Jaubert-Possamai S, Tagu D. Cuticular proteins and  
590           seasonal photoperiodism in aphids. *Insect Biochem Mol Biol.* 2010;40(3):235–40. doi:  
591           10.1016/j.ibmb.2009.12.001.
- 592   73.   Cilia M, Tamborindéguy C, Fish T, Howe K, Thannhauser TW, Gray SM. Genetics coupled to  
593           quantitative intact proteomics links heritable aphid and endosymbiont protein expression to  
594           circulative polerovirus transmission. *J Virol.* 2011;85(5):2148–66. doi: 10.1128/JVI.01504-10.
- 595   74.   Wang H, Wu K, Liu Y, Wu Y, Wang X. Integrative proteomics to understand the transmission  
596           mechanism of *Barley yellow dwarf virus-GPV* by its insect vector *Rhopalosiphum padi*. *Sci Rep.*  
597           2015;5:10971. doi: 10.1038/srep10971.
- 598   75.   Seddas P, Boissinot S, Strub JM, Van Dorsselaer A, Van Regenmortel MHV, Pattus F. Rack-1,  
599           GAPDH3, and actin: proteins of *Myzus persicae* potentially involved in the transcytosis of *Beet*  
600           *western yellows virus* particles in the aphid. *Virology.* 2004;325(2):399–412. doi:  
601           10.1016/j.virol.2004.05.014
- 602   76.   Yang Z, Zhang F, Zhu L, He G. Identification of differentially expressed genes in brown  
603           planthopper *Nilaparvata lugens* (Hemiptera: Delphacidae) responding to host plant resistance .  
604           *Bull Entomol Res.* 2006;96(1):53–9. doi: 10.1079/ber2005400.
- 605   77.   Bass C, Zimmer CT, Riveron JM, Wilding CS, Wondji CS, Kausmann M, et al. Gene  
606           amplification and microsatellite polymorphism underlie a recent insect host shift. *Proc Natl Acad*  
607           *Sci.* 2013;110(48):19460–5. doi: 10.1073/pnas.1314122110
- 608   78.   Ramsey JS, Elzinga DA, Sarkar P, Xin YR, Ghanim M, Jander G. Adaptation to nicotine feeding  
609           in *Myzus persicae*. *J Chem Ecol.* 2014;40(8):869–77. doi: 10.1007/s10886-014-0482-5
- 610   79.   Casteel CL, Jander G. New synthesis: investigating mutualisms in virus-vector interactions. *J*  
611           *Chem Ecol.* 2013;39(7):809. doi: 10.1007/s10886-013-0305-0.
- 612   80.   Götz M, Popovski S, Kollenberg M, Gorovits R, Brown JK, Cicero JM, et al. Implication of  
613           *Bemisia tabaci* *HEAT SHOCK PROTEIN 70* in *Begomovirus*-whitefly interactions. *J Virol.*

- 614 2012;86(24):13241-52. doi: 10.1128/JVI.00880-12.
- 615 81. Porrás MF, Navas CA, Marden JH, Mescher MC, De Moraes CM, Pincebourde S, et al. Enhanced  
616 heat tolerance of viral-infected aphids leads to niche expansion and reduced interspecific  
617 competition. *Nat Commun.* 2020;11(1):1184. doi: 10.1038/s41467-020-14953-2.
- 618 82. Syller J. The influence of temperature on transmission of potato leaf roll virus by *Myzus persicae*  
619 Sulz. *Potato Res.* 1987;30(1):47–58. doi: 10.1007/BF02357683.
- 620 83. Syller J. The Effects of Temperature on the Susceptibility of Potato Plants to Infection and  
621 Accumulation of *Potato Leafroll Virus*. *J Phytopathol.* 1991;133(3):216–24. doi: 10.1111/j.1439-  
622 0434.1991.tb00156.x
- 623 84. Chung BN, Canto T, Tenllado F, Choi KS, Joa JH, Ahn JJ, et al. The effects of high temperature  
624 on infection by *Potato virus Y*, *Potato virus A*, and *Potato leafroll virus*. *Plant Pathol J.*  
625 2016;32(4):321-8. doi: 10.5423/PPJ.OA.12.2015.0259.
- 626 85. Mandrioli M, Manicardi GC. Chromosomal mapping reveals a dynamic organization of the  
627 histone genes in aphids (Hemiptera: Aphididae). *Entomologia.* 2013 1(1), e2. doi:  
628 10.4081/entomologia.2013.e2.
- 629 86. Enders LS, Bickel RD, Brisson JA, Heng-Moss TM, Siegfried BD, Zera AJ, et al. Abiotic and  
630 biotic stressors causing equivalent mortality induce highly variable transcriptional responses in the  
631 soybean aphid. *G3 (Bethesda).* 2014;5(2):261-70. doi: 10.1534/g3.114.015149.
- 632 87. Prado F, Jimeno-González S, Reyes JC. Histone availability as a strategy to control gene  
633 expression. *RNA Biol.* 2017;14(3):281-286. doi: 10.1080/15476286.2016.1189071.
- 634 88. Shigenobu S, Watanabe H, Hattori M, Sakaki Y, Ishikawa H. Genome sequence of the  
635 endocellular bacterial symbiont of aphids *Buchnera* sp. *APS. Nature.* 2000;407(6800):81-6. doi:  
636 10.1038/35024074.
- 637 89. Jiang Z, Jones DH, Khuri S, Tsinoremas NF, Wyss T, Jander G, et al. Comparative analysis of  
638 genome sequences from four strains of the *Buchnera aphidicola* Mp endosymbiont of the green  
639 peach aphid, *Myzus persicae*. *BMC Genomics.* 2013;14(1):917. doi: 10.1186/1471-2164-14-917

- 640 90. Wilcox JL, Dunbar HE, Wolfinger RD, Moran NA. Consequences of reductive evolution for gene  
641 expression in an obligate endosymbiont. *Mol Microbiol.* 2003;48(6):1491-500. doi:  
642 10.1046/j.1365-2958.2003.03522.x.
- 643 91. Karp PD, Billington R, Caspi R, Fulcher CA, Latendresse M, Kothari A, et al. The BioCyc  
644 collection of microbial genomes and metabolic pathways. *Brief Bioinform.* 2019;20(4):1085-1093.  
645 doi: 10.1093/bib/bbx085.
- 646 92. Gross CA. Function and regulation of the heat shock proteins. 2nd ed. Neidhardt FC, editor. Vol.  
647 1, *Escherichia coli* and *Salmonella*: Cellular and Molecular Biology. Washington DC: American  
648 Society for Microbiology Press; 1996. 1382–1399 p.
- 649 93. Chong RA, Moran NA. Intraspecific genetic variation in hosts affects regulation of obligate  
650 heritable symbionts. *Proc Natl Acad Sci.* 2016;113(46):13114–9. doi: 10.1073/pnas.1610749113.
- 651 94. Pers D, Hansen AK. The boom and bust of the aphid’s essential amino acid metabolism across  
652 nymphal development. *G3 (Bethesda).* 2021;jkab115. doi: 10.1093/g3journal/jkab115.
- 653 95. Zhang B, Leonard SP, Li Y, Moran NA. Obligate bacterial endosymbionts limit thermal tolerance  
654 of insect host species. *Proc Natl Acad Sci.* 2019;116(49):24712–8. doi: 10.1073/pnas.1915307116.
- 655 96. Dunbar HE, Wilson ACC, Ferguson NR, Moran NA. Aphid thermal tolerance is governed by a  
656 point mutation in bacterial symbionts. *PLoS Biol.* 2007;5(5):e96. doi:  
657 10.1371/journal.pbio.0050096.
- 658 97. Moran NA, Yun Y. Experimental replacement of an obligate insect symbiont. *Proc Natl Acad Sci.*  
659 2015;112(7):2093–6. doi: 10.1073/pnas.1420037112
- 660 98. Fares MA, Barrio E, Sabater-Muñoz B, Moya A. The evolution of the heat-shock protein GroEL  
661 from *Buchnera*, the primary endosymbiont of aphids, is governed by positive selection. *Mol Biol*  
662 *Evol.* 2002;19(7):1162–70. doi: 0.1093/oxfordjournals.molbev.a004174
- 663 99. Kliot A, Cilia M, Czosnek H, Ghanim M. Implication of the bacterial endosymbiont *Rickettsia*  
664 spp. in interactions of the whitefly *Bemisia tabaci* with *Tomato yellow leaf curl virus*. *J Virol.*  
665 2014; 15;88(10):5652–60. doi: 10.1128/JVI.00071-14

- 666 100. Hosseinzadeh S, Shams-Bakhsh M, Mann M, Fattah-Hosseini S, Bagheri A, Mehrabadi M, et al.  
667 Distribution and variation of bacterial endosymbiont and “*Candidatus Liberibacter asiaticus*” titer  
668 in the Huanglongbing insect vector, *Diaphorina citri* Kuwayama. Microb Ecol. 2019;78(1):206-  
669 222. doi: 10.1007/s00248-018-1290-1.
- 670 101. Ramsey JS, Johnson RS, Hoki JS, Kruse A, Mahoney J, Hilf ME, et al. Metabolic interplay  
671 between the asian citrus psyllid and its proffotella symbiont: An achilles’ heel of the citrus greening  
672 insect vector. PLoS One. 2015;10(11):e0140826. doi: 10.1371/journal.pone.0140826.
- 673 102. Smith TE, Moran NA. Coordination of host and symbiont gene expression reveals a metabolic  
674 tug-of-war between aphids and Buchnera. Proc Natl Acad Sci. 2020;117(4):2113–21. doi:  
675 10.1073/pnas.1916748117

## 676 **Figure Legends**

677 **Fig 1. Overview of *Myzus persicae* transcriptome after *Potato leafroll virus* (PLRV)**  
678 **acquisition.** (A) Number of paired-end reads generated for each library by Illumina HiSeq  
679 sequencing. The dashed line represents the average of paired-end reads from all 6  
680 libraries. (B) Proportion of uniquely mapped, multimapped, and unmapped reads obtained for  
681 each library. Reads were mapped in the *Myzus persicae* clone G006 genome (AphidBase).  
682 (C) Principal component analysis of normalized count data from all samples. (D) Hierarchical  
683 clustering analysis of normalized count data z-scores exhibited by differentially expressed genes  
684 (DEGs) within each sample. (E) Volcano-plots of  $-\log_{10}p$  and  $\log_2FC$  exhibited by each gene in  
685 viruliferous aphids compared to controls. Up- and down-regulated genes are presented in red and  
686 green, respectively. (F) Numbers of up- and down-regulated DEGs in viruliferous aphids in  
687 comparison to control aphids. DEGs were identified using DESeq2 and defined by  $|\log_2FC| \geq 0.5$   
688 and false discovery rate (FDR)-corrected p-value  $\leq 0.1$ . Control (aphids without virus);  
689 Viruliferous (aphids carrying PLVR). FC, fold-change; p, FDR-corrected p-value.

690

691 **Fig 2. Blast2GO Gene Ontology of DEGs arranged by functional categories.** (A) Biological  
692 processes (BP), (B) Molecular Function (MF), and (C) Cellular Component (CC). The predicted  
693 gene functions of differentially expressed genes as assigned by Blast2GO at level 2-3 in each  
694 aforementioned category. Each DEG may be assigned to one or more GOterm, with a total of  
695 391 GOterms from the three functional groups assigned to the 134 DEGs.

696 **Fig 3. Blast2GO annotation for up-regulated DEGs and down-regulated DEGs in aphids**  
697 **carrying PLRV compared to controls.** The consensus description predicted by Blast2GO of  
698 the (A) 64 up-regulated DEGs and the (B) 70 down-regulated DEGs.

699

700 **Fig 4: Relative transcript abundance of two genes in *Myzus persicae* with and without**  
701 ***Potato leafroll virus* (PLRV).** (A) A cuticle related protein (MPCP5-like) was significantly up-  
702 regulated in expression in individuals with PLRV compared to virus free controls. (B) A  
703 predicted heat shock protein (HSP68-like) was significantly down-regulated in expression in  
704 individuals with PLRV compared to controls. Transcripts were measured relative to a  
705 housekeeping gene *RPL7*. Significant differences were calculated using an ANOVA (\* $P < 0.05$ ;  
706 Error bars represent  $\pm$ SEM).

707 **Fig 5. *Buchnera aphidicola* titer and transcript changes in *Myzus persicae* with *Potato***  
708 ***leafroll virus* (PLRV).** (A) Ratio of a single copy *Buchnera* gene *rpIN* relative to a single copy  
709 aphid gene *RPL7*, demonstrates *M. persicae* with PLRV have a decreased *Buchnera aphidicola*  
710 titer relative to control aphids. (B-D) *Buchnera* transcripts *groEL*, *dnaK*, and *argE* relative to the  
711 *Buchnera* gene *rpIN* housekeeping gene. All three transcripts were down-regulated in

712 viruliferous *M. persicae* compared to virus free controls. Significant differences were calculated  
713 using an ANOVA (\* $P < 0.05$ ; Error bars represent  $\pm$ SEM).

714

715

716

## 717 **Tables**

718 **Table 1: RNAseq Stats.**

| Sample Name | Total paired-end reads | Total alignments | Aligned | Unique paired | Non-unique paired |
|-------------|------------------------|------------------|---------|---------------|-------------------|
| Control 33  | 40,676,571             | 30,990,077       | 76.17%  | 28.52%        | 47.67%            |
| Control 34  | 18,942,570             | 13,440,120       | 70.80%  | 25.89%        | 45.07%            |
| Control 35  | 22,651,445             | 16,478,122       | 72.49%  | 25.93%        | 46.82%            |
| PLRV 36     | 25,343,473             | 18,306,992       | 72.12%  | 26.30%        | 45.94%            |
| PLRV 37     | 23,743,718             | 17,496,940       | 73.63%  | 27.15%        | 46.54%            |
| PLRV 38     | 23,533,704             | 17,410,337       | 73.78%  | 27.05%        | 46.93%            |

719

720

721

722

723

724

725

726

727

728

729

730

731

732

733

734 **Table 2: Most highly up-regulated *M. persicae* genes that were characterized\* in aphids**  
 735 **carrying PLRV compared to controls.** DEGs determined by adjusted p value < 0.1 and  
 736 described by Blast2GO. Gene ID corresponds to MYZPE13164\_G006\_v1.0\_XXXXXXXXXX.X  
 737 found on AphidBase.org. Regulation of bolded transcripts were validated in a separate  
 738 experiment.

739 \*20 uncharacterized genes were up-regulated (See Supplementary Table S2)

| Putative function    | Gene ID                     | Blast2GO consensus description                 | p-val                                     | log2        |
|----------------------|-----------------------------|------------------------------------------------|-------------------------------------------|-------------|
| Cytochrome P450      | 000087490.2                 | cytochrome P450 4C1-like                       | 1.30E-05                                  | 2.34        |
|                      | 000113270.1                 | cytochrome P450 4C1-like                       | 1.90E-05                                  | 2.21        |
|                      | 000087490.3                 | cytochrome P450 4C1-like                       | 3.10E-09                                  | 2.16        |
|                      | 000111320.1                 | cytochrome P450 6k1-like                       | 1.10E-04                                  | 0.95        |
| Cuticle related      | <b>000133030.2</b>          | <b>Adhesion plaque protein, chitin binding</b> | <b>4.60E-05</b>                           | <b>2.24</b> |
|                      | 000133030.1                 | Adhesion plaque protein, chitin binding        | 1.90E-04                                  | 1.91        |
|                      | 000086070.1                 | endocuticle glycoprotein in abdomen            | 3.00E-07                                  | 1.05        |
|                      | 000079280.1                 | osiris 20-like                                 | 1.80E-06                                  | 0.95        |
|                      | 000103820.1                 | Adhesion plaque protein, chitin binding        | 6.60E-06                                  | 0.88        |
|                      | 000103820.2                 | Adhesion plaque protein, chitin binding        | 1.50E-06                                  | 0.87        |
|                      | 000079260.1                 | osiris 18                                      | 9.40E-05                                  | 0.85        |
|                      | 000084640.1                 | glycine and glutamine-rich                     | 1.40E-05                                  | 0.77        |
|                      | 000047580.1                 | Myzus persicae tentative cuticle protein       | 2.60E-04                                  | 0.74        |
|                      | Kinase Inhibitor repressors | 000156640.1                                    | 52 kDa repressor of kinase inhibitor-like | 7.10E-05    |
| 000156640.2          |                             | 52 kDa repressor of kinase inhibitor-like      | 3.70E-04                                  | 0.79        |
| 000156640.4          |                             | 52 kDa repressor of kinase inhibitor-like      | 3.50E-04                                  | 0.78        |
| Kinases              | 000073070.1                 | alpha- kinase 1-like                           | 2.20E-06                                  | 0.78        |
|                      | 000137500.2                 | serine threonine- kinase (NEK3)                | 2.20E-06                                  | 0.76        |
| Hydrolase            | 000181580.1                 | N-acetylmuramoyl-L-alanine amidase-like        | 4.40E-04                                  | 0.93        |
| Transcription factor | 000125820.1                 | transcription factor A2 (mab3-liked)           | 1.10E-05                                  | 1.94        |
| Zinc Transport       | 000174630.1                 | 39S ribosomal mitochondrial                    | 8.60E-05                                  | 0.77        |
| Membrane             | 000137380.1                 | histidine-rich glycoprotein                    | 3.00E-05                                  | 0.90        |
| Cell organization    | 000090710.1                 | cytoskeleton-regulatory complex (pan1-like)    | 4.80E-04                                  | 1.268       |
|                      | 000021370.2                 | microtubular process (CFA58-like)              | 4.70E-04                                  | 1.265       |



740 | 000189110.1 actin reorganization (WAS-like) 4.50E-04 0.83

741

742 **Table 3: Most highly down-regulated *M. persicae* transcripts that were characterized\* in**  
 743 **aphids carrying PLRV compared to controls.** DEGs determined by adjusted p value < 0.1 and  
 744 described by Blast2GO. Gene ID corresponds to MYZPE13164\_G006\_v1.0\_XXXXXXXXXX.X  
 745 found on AphidBase.org. Regulation of bolded transcripts were validated in a separate  
 746 experiment.

747 \*33 uncharacterized genes were down-regulated (See Supplemental Table S2)

| Putative function       | Gene               | Blast2GO consensus description                         | p-value         | log2         |
|-------------------------|--------------------|--------------------------------------------------------|-----------------|--------------|
| Histones                | 000100490.1        | histone H3                                             | 5.06E-05        | -2.58        |
|                         | 000100610.1        | histone H3                                             | 2.69E-04        | -2.14        |
|                         | 000100770.1        | histone H3                                             | 1.04E-04        | -1.74        |
|                         | 000100600.1        | histone H2A                                            | 1.38E-04        | -1.75        |
|                         | 000092680.1        | histone H2A-like                                       | 9.76E-05        | -1.47        |
|                         | 000100590.1        | histone H2B-like                                       | 7.37E-05        | -1.18        |
|                         | 000100620.1        | histone H4                                             | 3.02E-04        | -0.96        |
| Histone Modifying       | 000163990.2        | glycine-rich DOT1-like                                 | 7.33E-05        | -0.81        |
|                         | 000163990.1        | glycine-rich DOT1-like                                 | 1.97E-04        | -0.76        |
| ubiquitination          | 000119640.3        | E3-ubiquitin ligase RNF19B-like                        | 6.08E-06        | -0.88        |
|                         | 000119640.1        | E3-ubiquitin ligase RNF19B-like                        | 1.42E-05        | -0.81        |
|                         | 000119640.2        | E3-ubiquitin ligase RNF19B-like                        | 2.34E-05        | -0.78        |
| Hydrolase               | 000133360.1        | serine carboxypeptidase                                | 1.10E-04        | -1.58        |
|                         | 000083200.2        | Arylsulfatase B-like                                   | 4.69E-04        | -1.11        |
|                         | 000083200.1        | Arylsulfatase B-like                                   | 3.25E-04        | -1.02        |
|                         | 000200070.1        | Thioesterase (THEM6-like)                              | 1.13E-04        | -0.82        |
| Response / Immunity     | 000071560.1        | Protease inhibitor (Papain inhibitor)                  | 2.91E-04        | -2.46        |
|                         | <b>000070430.1</b> | <b>Heat shock 68-like</b>                              | <b>4.85E-04</b> | <b>-1.88</b> |
|                         | 000193260.2        | G- coupled receptor Mth-like 3                         | 2.03E-04        | -0.80        |
| Transport               | 000029670.1        | dynein intermediate chain-like                         | 1.90E-05        | -1.01        |
|                         | NRF6               | Lipid transport (NRF6-like)                            | 5.18E-05        | -0.85        |
|                         | 000203490.1        | zinc finger C3H1 type-like 2-A                         | 1.03E-04        | -0.86        |
|                         | 000072950.2        | Sugar transport (TRET1-like)                           | 6.74E-06        | -0.81        |
| nucleic acid metabolism | 000036830.1        | DNA integration<br>(pol poly retrotransposon-related)  | 1.86E-04        | -0.89        |
|                         | 000012610.1        | mRNA catabolic process<br>(BRISC/BRCA1-A complex-Like) | 5.14E-04        | -0.84        |

748

749

750

751

752 **Supporting Information**

753 Supplementary Figure S1: Explanation of process

754 Supplementary Table S1: Primer Table

755 Supplementary Table S2: RNAseq significance list

756 Supplementary Table S3: Conserved  $\sigma_{32}$  -10 and -35 binding sites in *Escherichia coli* and

757 *Buchnera* taxa

758

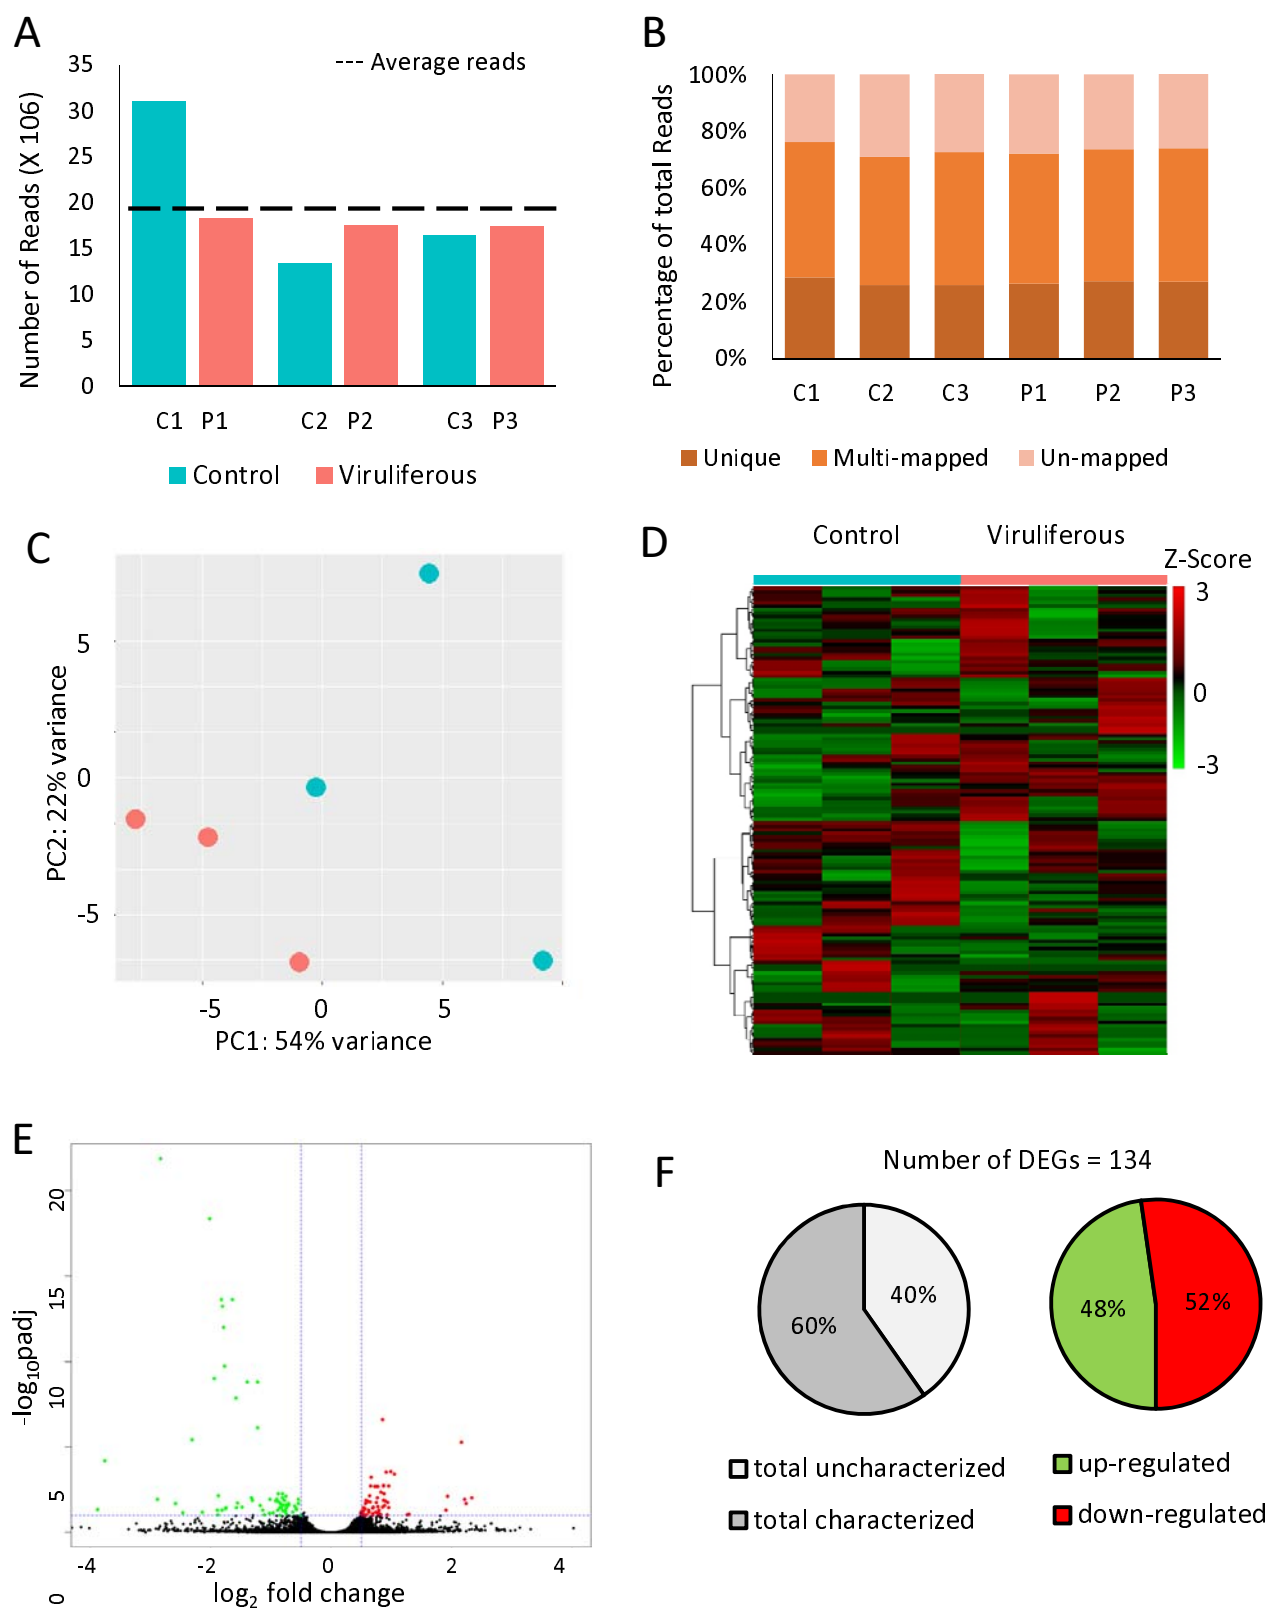

Figure 1: Overview of *Myzus persicae* transcriptome after *Potato leafroll virus* (PLRV) acquisition.

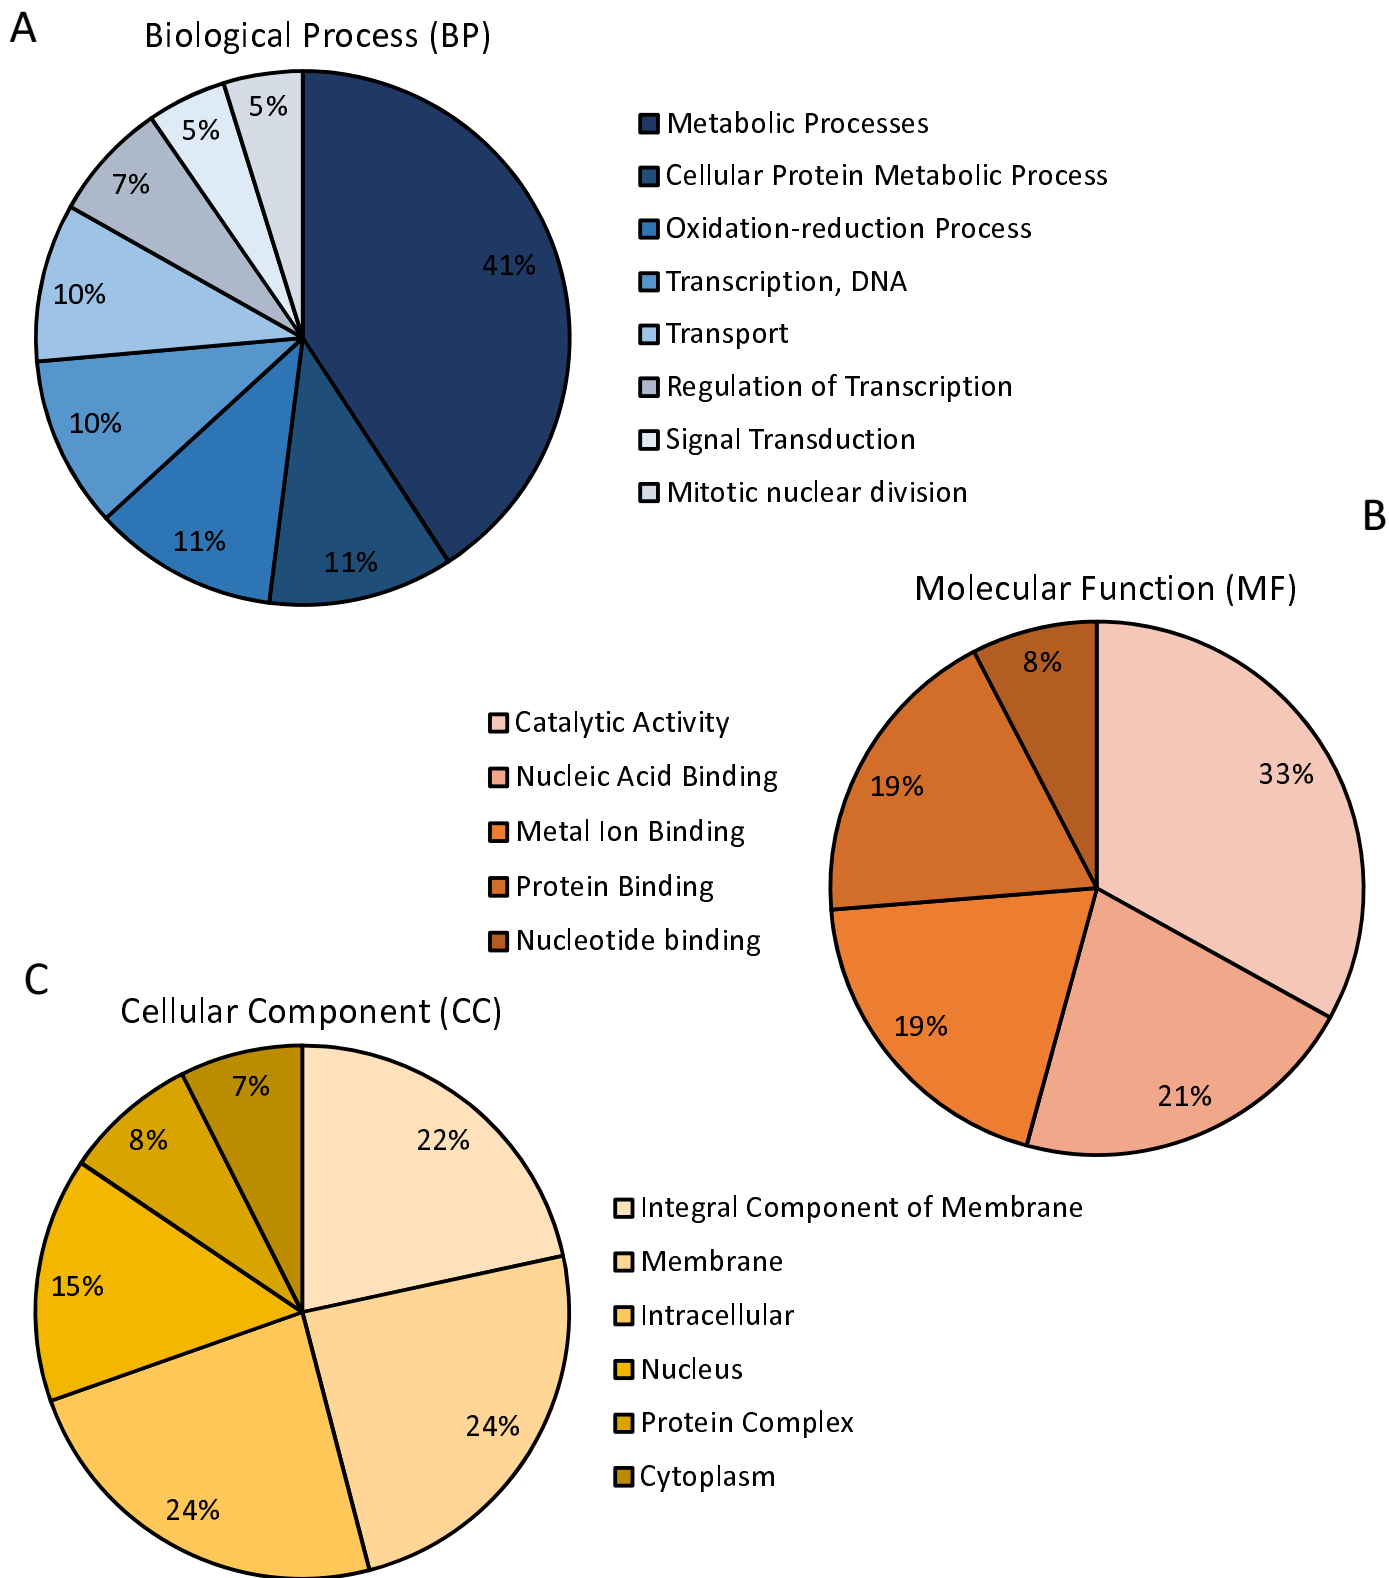

Figure 2: Blast2GO Gene Ontology of DEGs arranged by functional categories.

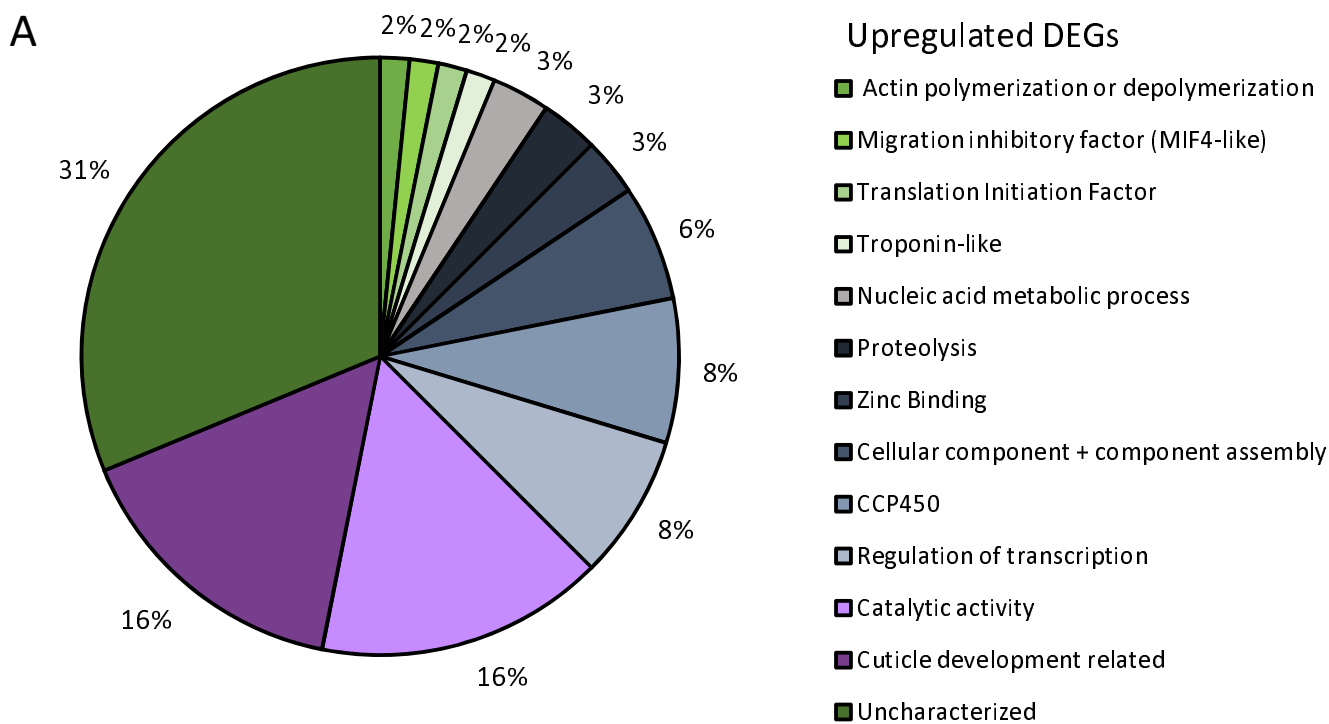

**B** DEGs Downregulated

- Cytoskeletal related
- Zinc Binding
- Histone Modification
- HSP (40, 68)
- Nucleic acid binding and metabolic process
- Proteolysis/Protein Ubiquitination
- Transmembrane transport
- Catalytic Activity
- Uncharacterized

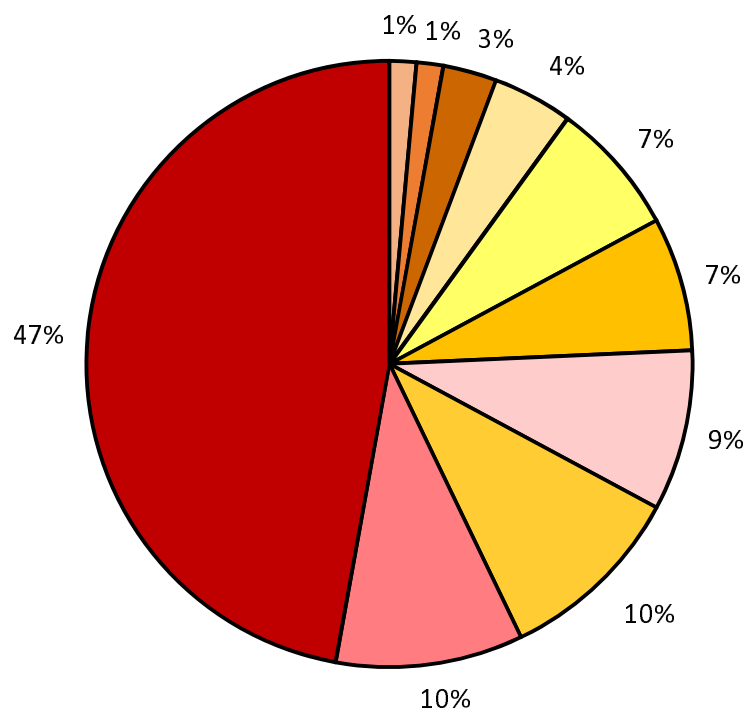

Figure 3: Blast2GO annotation for the up-regulated DEGs and down-regulated DEGs in aphid carrying PLRV compared to controls.

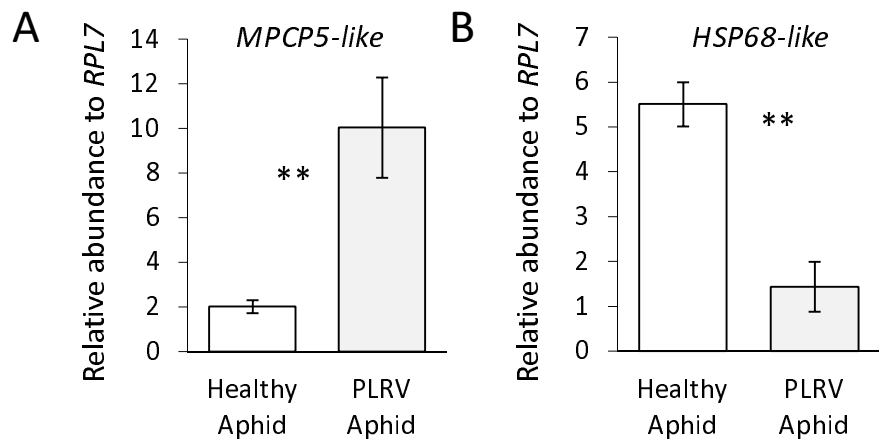

**Fig 4: Relative transcript abundance of two genes in *Myzus persicae* with and without *Potato leafroll virus* (PLRV).** (A) A cuticle related protein (MPCP5-like) was significantly up-regulated in expression in individuals with PLRV compared to virus free controls. (B) A predicted heat shock protein (HSP68-like) was significantly down-regulated in expression in individuals with PLRV compared to controls. Transcripts were measured relative to a housekeeping gene *RPL7*. Significant differences were calculated using an ANOVA (\* $P < 0.05$ ; Error bars represent  $\pm$ SEM).

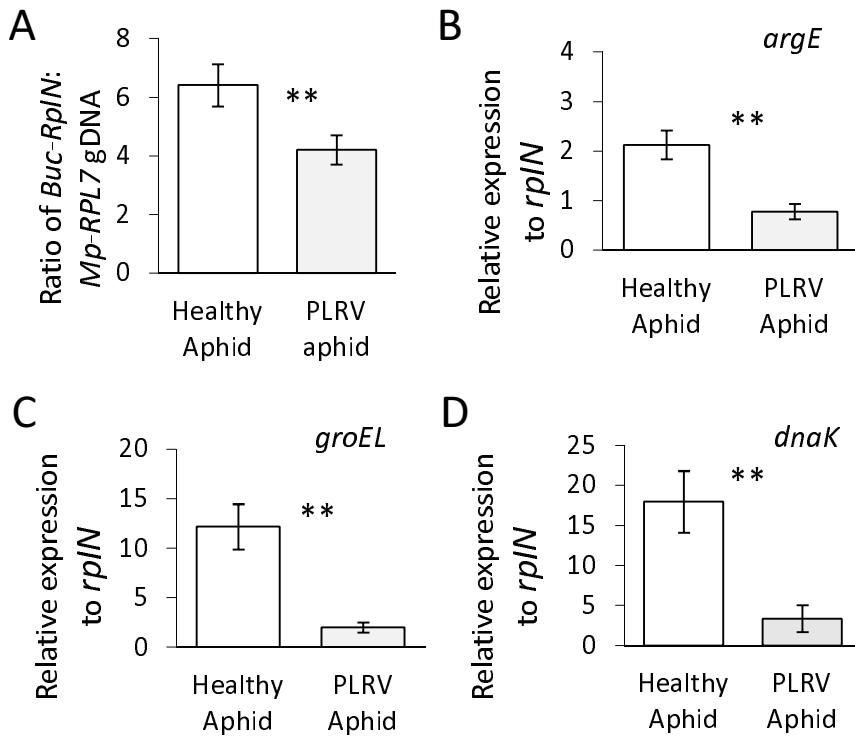

- **Fig 5. *Buchnera aphidicola* titer and transcript changes in *Myzus persicae* with *Potato leafroll virus* (PLRV).** (A) Ratio of a single copy *Buchnera* gene *rpIN* relative to a single copy aphid gene *RPL7*, demonstrates *M. persicae* with PLRV have a decreased *Buchnera aphidicola* titer relative to control aphids. (B-D) *Buchnera* transcripts *groEL*, *dnaK*, and *argE* relative to the *Buchnera* gene *rpIN* housekeeping gene. All three transcripts were down-regulated in viruliferous *M. persicae* compared to virus free controls. Significant differences were calculated using an ANOVA (\* $P < 0.05$ ; Error bars represent  $\pm$ SEM).

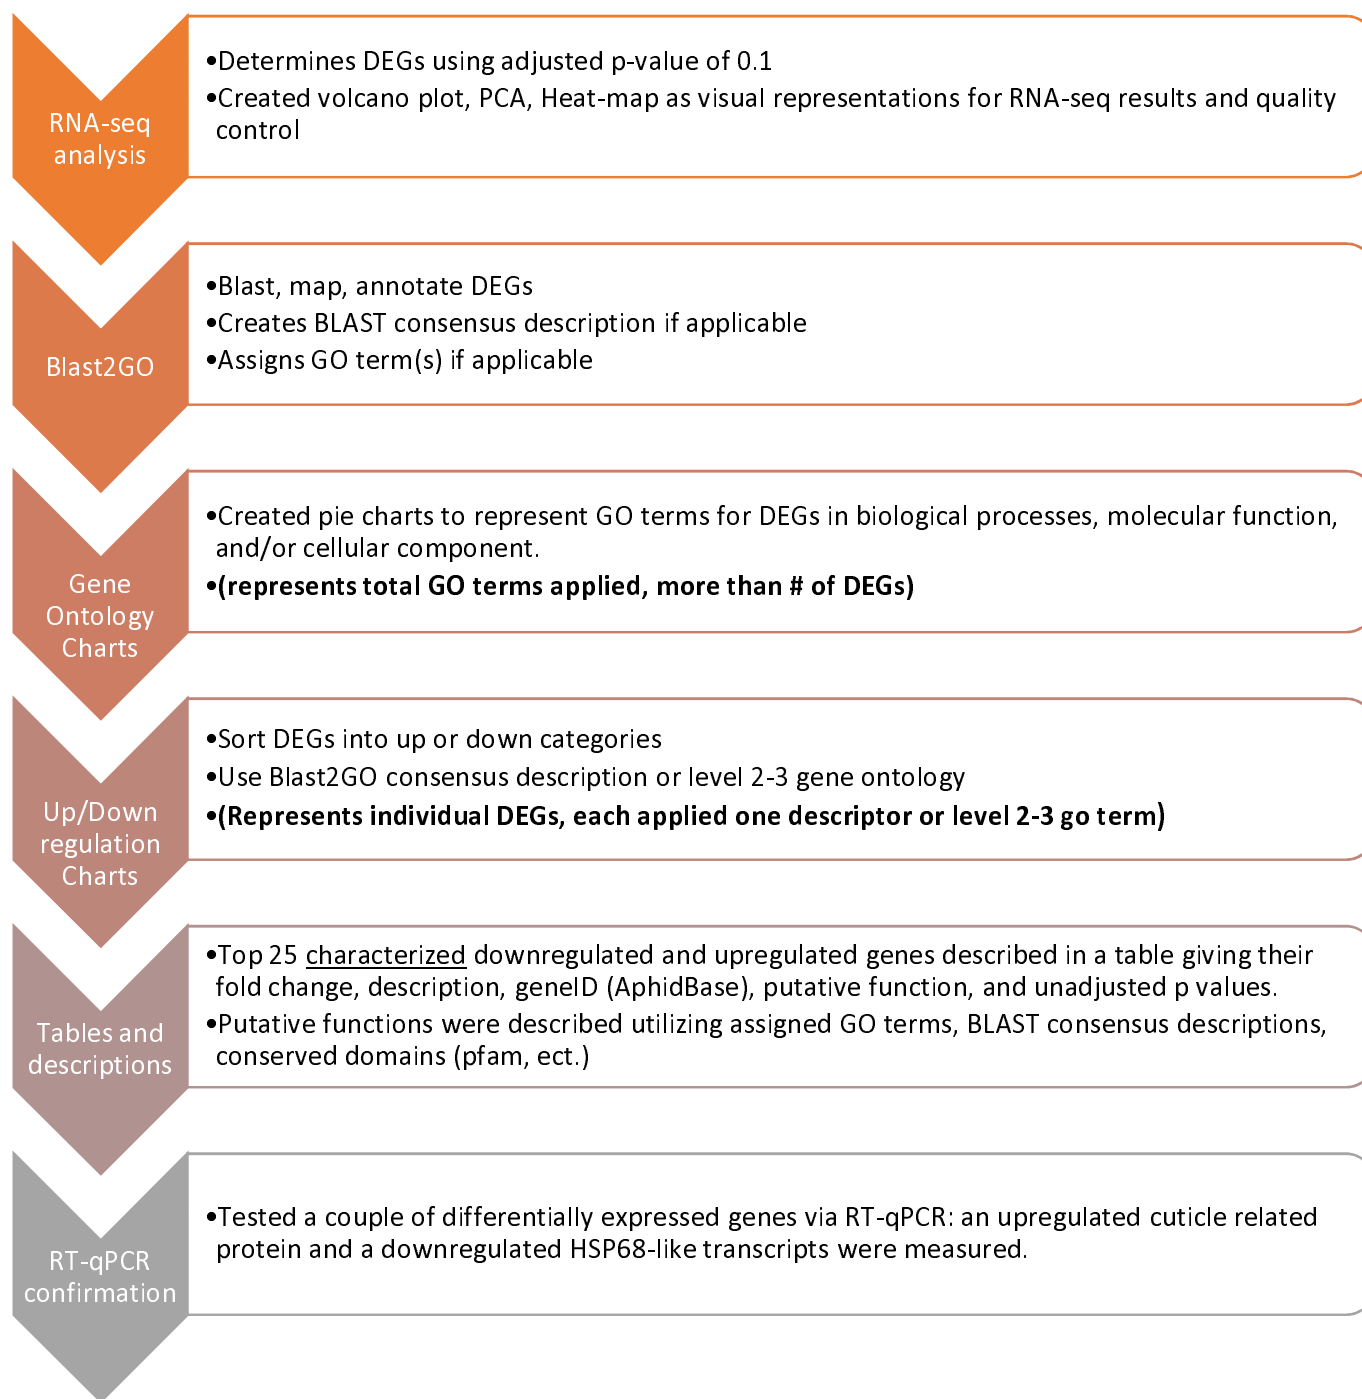

Figure S1: Explanation of process
